# Supplementary material for: Cow Milk Extracellular Vesicle Effects on an In Vitro Model of Intestinal Inflammation
Source: MDPI journal article supplement (doi:10.3390/biomedicines10030570), 2022-02-28
Supplement: s1 [file s1]

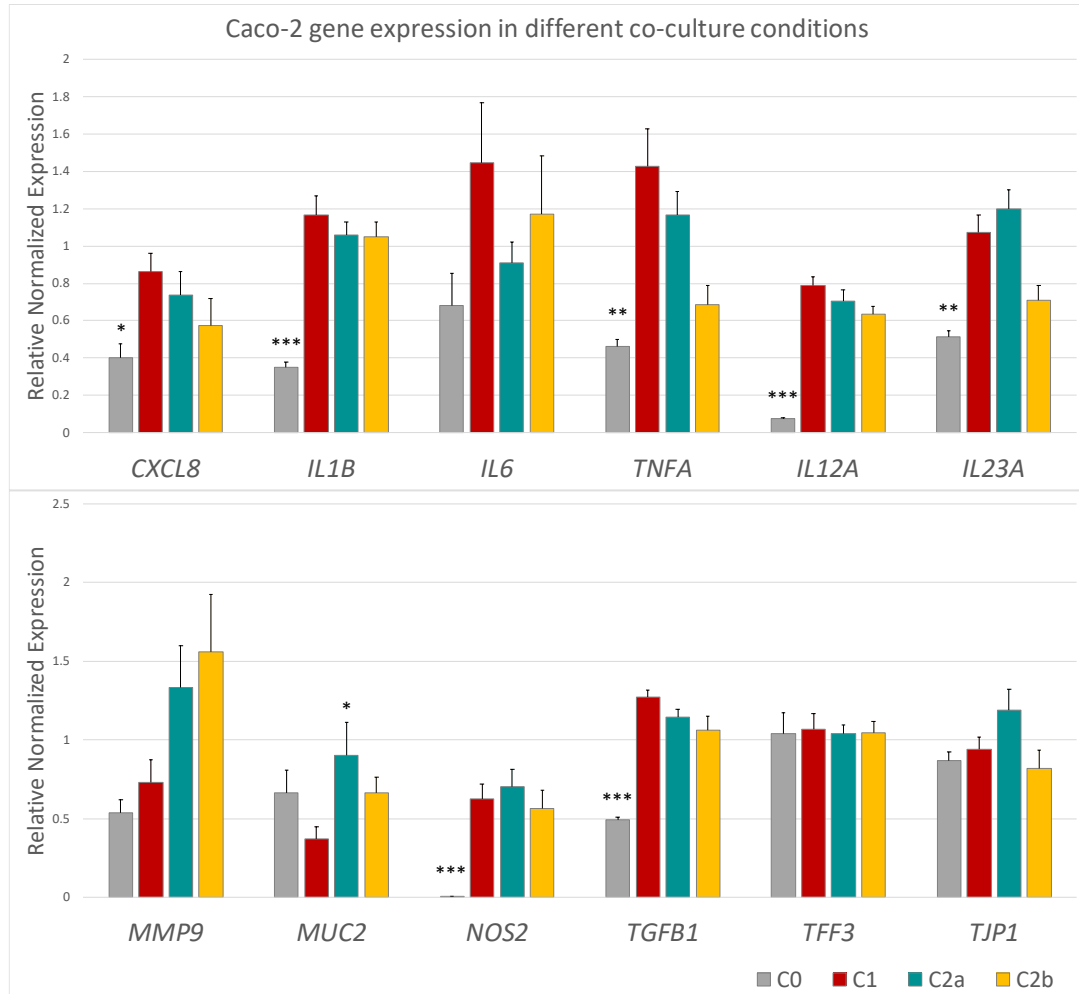

Figure S1. Histogram of Caco-2 tested gene expression in the different culture conditions: Co-culture of Caco-2 and THP-1 cells in basal conditions (C0 - grey), Inflamed co-culture (C1 - red),  $10^8$  mEV administering to Caco-2 cells in inflamed co-culture (C2a - green) and  $10^8$  mEV administering to Caco-2 and THP-1 cells in inflamed co-culture (C2b - yellow). Differences (others *vs* C1) were evaluated through the Kruskal-Wallis test and applying the post-doc Dunn's Multiple Comparison Test. The asterisks indicate the statistical significance: \*  $p < 0.05$ , \*\*  $p < 0.01$  and \*\*\*  $p < 0.001$ .

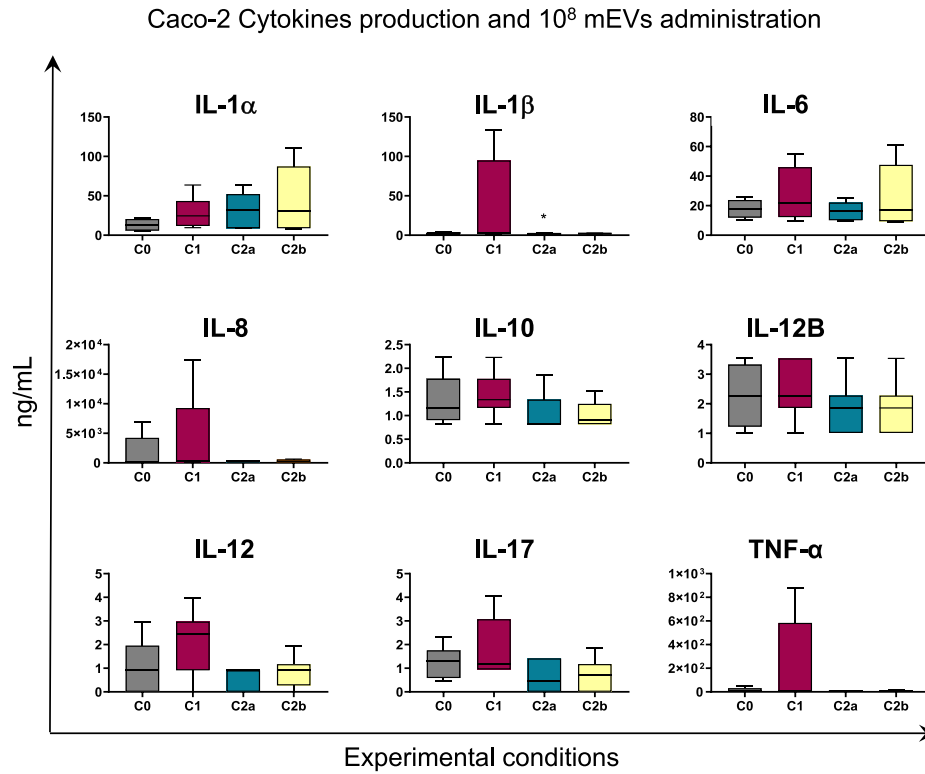

Figure S2.  $10^8$  mEV impact on cytokine production by Caco-2. Co-culture of Caco-2 and THP-1 cells were left untreated (basal condition, C0), or stimulated with IFN- $\gamma$  and LPS (inflamed co-culture, C1). 24h post-stimulation,  $10^8$  mEV suspension was added to Caco-2 cells in inflamed co-culture (C2a) or to both Caco-2 and THP-1 cells in inflamed co-culture (C2b). 24h later, culture supernatants were collected, and levels of cytokines were determined through ELISA. Data are presented as box-and-whisker plots displaying median and interquartile range (boxes) and minimum and maximum values (whiskers). Values of C0, C2a, C2b were compared to C1, using a ANOVA followed by Dunnett's multiple comparison test or a Kruskal-Wallis test followed by Dunn's multiple comparison test; \*  $p < 0.05$ , \*\*  $p < 0.01$  and \*\*\*  $p < 0.001$ .

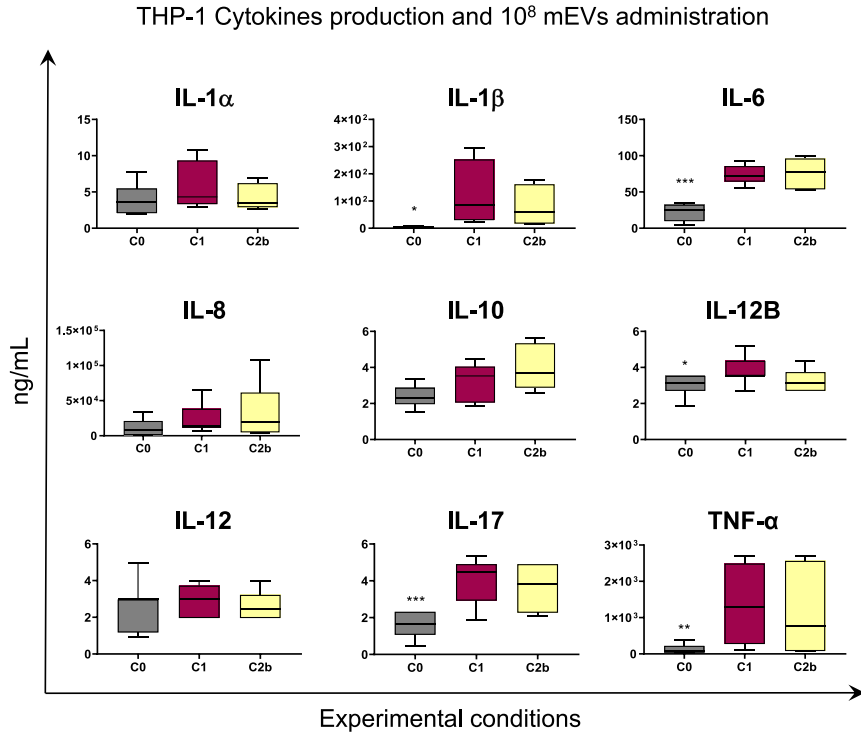

Figure S3.  $10^8$  mEV impact on cytokine production by THP-1. Co-culture of Caco-2 and THP-1 cells were left untreated (basal condition, C0), or stimulated with IFN- $\gamma$  and LPS (inflamed co-culture, C1). 24h post-stimulation,  $10^8$  mEV suspension was added to both Caco-2 and THP-1 cells in inflamed co-culture (C2b). 24h later, culture supernatants were collected, and levels of cytokines were determined through ELISA. Data are presented as box-and-whisker plots displaying median and interquartile range (boxes) and minimum and maximum values (whiskers). Values of C0, C2a, C2b were compared to C1, using a ANOVA followed by Dunnett's multiple comparison test or a Kruskal-Wallis test followed by Dunn's multiple comparison test; \*  $p < 0.05$ , \*\*  $p < 0.01$  and \*\*\*  $p < 0.001$ .
